# Supplementary material for: Prostaglandin F2α agonist-induced suppression of 3T3-L1 cell adipogenesis affects spatial formation of extra-cellular matrix
Source: PubMed Central journal article supplement (PMC7224398; doi:10.1038/s41598-020-64674-1), 2020-05-14
Supplement: 41598_2020_64674_MOESM1_ESM.pdf [file 41598_2020_64674_MOESM1_ESM.pdf]

Prostaglandin F<sub>2</sub> $\alpha$  agonist-induced suppression of 3T3-L1 cell adipogenesis affects spatial formation of extra-cellular matrix

Yosuke Ida, Fumihito Hikage, Kaku Itoh, Haruka Ida, Hiroshi Ohguro.

Departments of Ophthalmology, Sapporo Medical University School of Medicine

**Supplemental Figure 1. Representative images of phase contrast microscopy of 3D organoids of human orbital adipocytes**

Human orbital adipocytes collected as surgical waste were subjected to primary culture and then subsequently subjected to the 3D organoid culture protocol as describe in the current 3T3 L1 cell. Here, the culture period was 12 days rather than 7 days. Scale bar: 100  $\mu$  m.

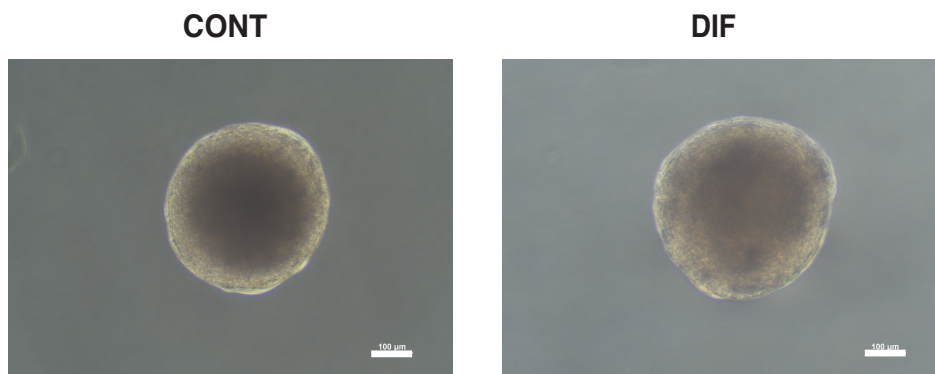

## Supplementary Table 1

Sequences of primers and Taqman probes used in the Real-time PCR are shown.

| Gene                | Forward primer (5' to 3') | Reverse primer (5' to 3') | TaqMan probe (5' to 3')                      |
|---------------------|---------------------------|---------------------------|----------------------------------------------|
| <b>Mouse</b>        |                           |                           |                                              |
| <i>Pparg</i>        | CTGCTCCACACTATGAAGACAT    | TGCAGTTCTACTTTGATCGC      | /FAM/AGCTGACCC/ZEN/AATGGTTGCTGATTACA/IABkFQ/ |
| <i>Leptin</i>       | GTGCCTATCCAGAAAGTCCAG     | AATGAAGTCCAAGCCAGTGA      | /FAM/ACCGACTGC/ZEN/GTGTGTGAAATGTCA/IABkFQ/   |
| <i>AdipoQ</i>       | TGTCTGTACGATTGTCAAGTGG    | GCAGGATTAAGAGGAACAGGAG    | /FAM/ACGACACCA/ZEN/AAAGGGCTCAGGAT/IABkFQ/    |
| <i>C/EBPα</i>       | ACAAGAACAGCAACGAGTACC     | TCATTGTCACTGGTCAACTCC     | /FAM/CGCAAGAGC/ZEN/CGAGATAAAGCCAAAC/IABkFQ/  |
| <i>Ap2</i>          | ACTTGTCTCCAGTAAAACTTTG    | ATCACATCCCCATTACACT       | /FAM/CAGGAAAGT/ZEN/GGCTGGCATGGC/IABkFQ/      |
| <i>PGF2receptor</i> | GCCATAATGTGCGTCTCCT       | GATCTGATTCCACGTTGCCA      | /FAM/TGGAGTCCC/ZEN/TTTCTGGTAACAATGGC/IABkFQ/ |
| <i>Col1a1</i>       | CGCAAAGAGTCTACATGTCTAGG   | CATTGTGTATGCAGCTGACTTC    | /FAM/CCGGAGGTC/ZEN/CACAAAGCTGAACA/IABkFQ/    |
| <i>Col4a1</i>       | TCTGGCTGTGGAAAATGTGA      | AATCCAATGACACCTTGCAAC     | /FAM/TCTTTCTCC/ZEN/CTTTGTCCCTTCACGC/IABkFQ/  |
| <i>Col6a1</i>       | CCAGATGAGTGTGAGATCCTG     | AAGTTCTGTAGGCCAATGCTC     | /FAM/ACCCATTGA/ZEN/CATCCTCTCGTGCTG/IABkFQ/   |
| <i>Fn1</i>          | GAGCTATCCATTCACCTTCAGA    | TTGTTCTGTAGACACTGGAGA     | /FAM/CAGGAGATT/ZEN/TGTTAGGACCACGGCA/IABkFQ/  |
| <i>36b4</i>         | TTATAACCCTGAAGTGCCTGAC    | CGCTTGATCCATTGATGATG      | /FAM/AGGCCCTGC/ZEN/ACTCTCGCTT/IABkFQ/        |
